# Supplementary material for: CD13 orients the apical-basal polarity axis necessary for lumen formation
Source: PubMed Central journal article supplement (PMC8338993; doi:10.1038/s41467-021-24993-x), 2021-08-04
Supplement: 41467_2021_24993_MOESM3_ESM.pdf [file 41467_2021_24993_MOESM3_ESM.pdf]

## **Description of Additional Supplementary Files**

File Name: Supplementary Movie 1

Description: Time-lapse series of Caco-2 cell polarization and lumen formation showing CD13-mCherry (magenta) and GFP-Par6 (green).

File Name: Supplementary Movie 2

Description: Time-lapse series of control (shScr) Caco-2 cells showing GFP-Rab11 (green) and phase-contrast during apical membrane initiation.

File Name: Supplementary Movie 3

Description: Confocal time-lapse series of CD13-depleted (shCD13-4) Caco-2 cells showing GFP-Rab11 (green) and phase-contrast during apical membrane initiation.
